# Supplementary material for: Genetic Basis of Acinetobacter sp. K1 Adaptation Mechanisms to Extreme Environmental Conditions
Source: MDPI journal article supplement (doi:10.3390/life13081728), 2023-08-11
Supplement: s1 [file s1]

## Supplementary material

### Genetic basis of *Acinetobacter* sp. K1 adaptation mechanisms to extreme environmental conditions

Nikola Petrová 1, Jana Kisková 1, Mariana Kolesárová1 and Peter Pristaš 1,2,\*

<sup>1</sup>Department of Microbiology, Institute of Biology and Ecology, Faculty of Sciences, Pavol Jozef Safarik University in Kosice, Srobarova 2, Kosice, 041 54, Slovak Republic

<sup>2</sup>Centre of Biosciences, Institute of Animal Physiology, Slovak Academy of Sciences, Soltesovej 4-6, 040 01 Kosice, Slovakia

\*Correspondence: peter.pristas@upjs.sk; Tel.: +421 55 234-1201

**Table S1.** Comparison of the general genome characteristics of various *Acinetobacter* strains deposited in the GenBank database using the RAST server [1-3].

| Bacterial strain             | GenBank accession No. | Genome size (bp) | Source of isolation<br>Country              | Number of contigs | G+C content (%) | Number of coding sequences | Number of RNAs |
|------------------------------|-----------------------|------------------|---------------------------------------------|-------------------|-----------------|----------------------------|----------------|
| <i>Acinetobacter</i> sp. K1  | NZ_JALGQY000000000.1  | 3 357 632        | brown mud<br>Ziar nad Hronom<br>Slovakia    | 94                | 42.8            | 3 324                      | 89             |
| <i>A. lwoffii</i> ZS207      | NZ_CP019143.1         | 3 259 224        | gold mine<br>Poland                         | 1                 | 43.2            | 3 197                      | 108            |
| <i>A. lwoffii</i> WJ10621    | NZ_CM001194.1         | 3 184 320        | clinical isolate<br>China                   | 9                 | 41.6            | 3 081                      | 106            |
| <i>A. lwoffii</i> CIP7031    | NZ_KB849830.1         | 3 546 109        | <i>Homo sapiens</i><br>USA                  | 12                | 42.8            | 3 421                      | 90             |
| <i>A. lwoffii</i> UBA2051    | DDAT000000000.1       | 2 880 324        | environmental isolate<br>USA                | 52                | 43.4            | 2 681                      | 59             |
| <i>A. lwoffii</i> UBA1649    | DCLL000000000.1       | 3 030 134        | environmental isolate<br>USA                | 63                | 43.3            | 2 801                      | 58             |
| <i>A. lwoffii</i> CIP 64.10  | NZ_APQS000000000.1    | 3 206 079        | unknown<br>USA                              | 16                | 43.0            | 2 992                      | 89             |
| <i>A. lwoffii</i> NBRC109760 | NZ_BBSQ000000000.1    | 3 298 884        | unknown<br>Japan                            | 100               | 43.1            | 3 130                      | 60             |
| <i>A. lwoffii</i> NIPH478    | NZ_APQU000000000.1    | 3 276 129        | ear swab<br>Czech Republic                  | 9                 | 42.9            | 3 067                      | 79             |
| <i>A. lwoffii</i> NIPH512    | NZ_AYHO000000000.1    | 3 384 618        | <i>Homo sapiens</i><br>USA                  | 12                | 43.1            | 3 221                      | 96             |
| <i>A. lwoffii</i> NIPH715    | NZ_APOT000000000.1    | 3 454 560        | Pus - <i>Homo sapiens</i><br>Czech Republic | 26                | 42.8            | 3 278                      | 91             |
| <i>A. lwoffii</i> SH145      | NZ_ACPN000000000.1    | 3 481 004        | <i>Homo sapiens</i><br>Germany              | 76                | 42.6            | 3 121                      | 68             |
| <i>A. lwoffii</i> TG19636    | NZ_AMJG000000000.1    | 3 497 784        | Urine - <i>Homo sapiens</i><br>USA          | 245               | 42.8            | 3 360                      | 84             |
| <i>A. pseudolwoffii</i>      | NZ_FLLN000000000.1    | 3 031 971        | unknown                                     | 12                | 43.3            | 2 832                      | 105            |

|                                                          |                   |           |                                                      |     |      |       |    |
|----------------------------------------------------------|-------------------|-----------|------------------------------------------------------|-----|------|-------|----|
| F78                                                      |                   |           | Germany                                              |     |      |       |    |
| <i>A. idrijaensis</i><br>MII                             | JQCU00000000.1    | 3 846 869 | mercury mine soil<br>Slovenia:Idrija                 | 689 | 42.9 | 4 177 | 61 |
| <i>A. idrijaensis</i><br>3_20180319_Bin_<br>METABAT_38_1 | CAJQPS000000000.1 | 2 235 053 | sea water<br>North Sea                               | 370 | 43.9 | 2 500 | 37 |
| <i>A. idrijaensis</i><br>WKH.25                          | JALRKB000000000.1 | 2 248 042 | estuarine open water<br>surface layer<br>South China | 743 | 43.8 | 2 863 | 35 |

---

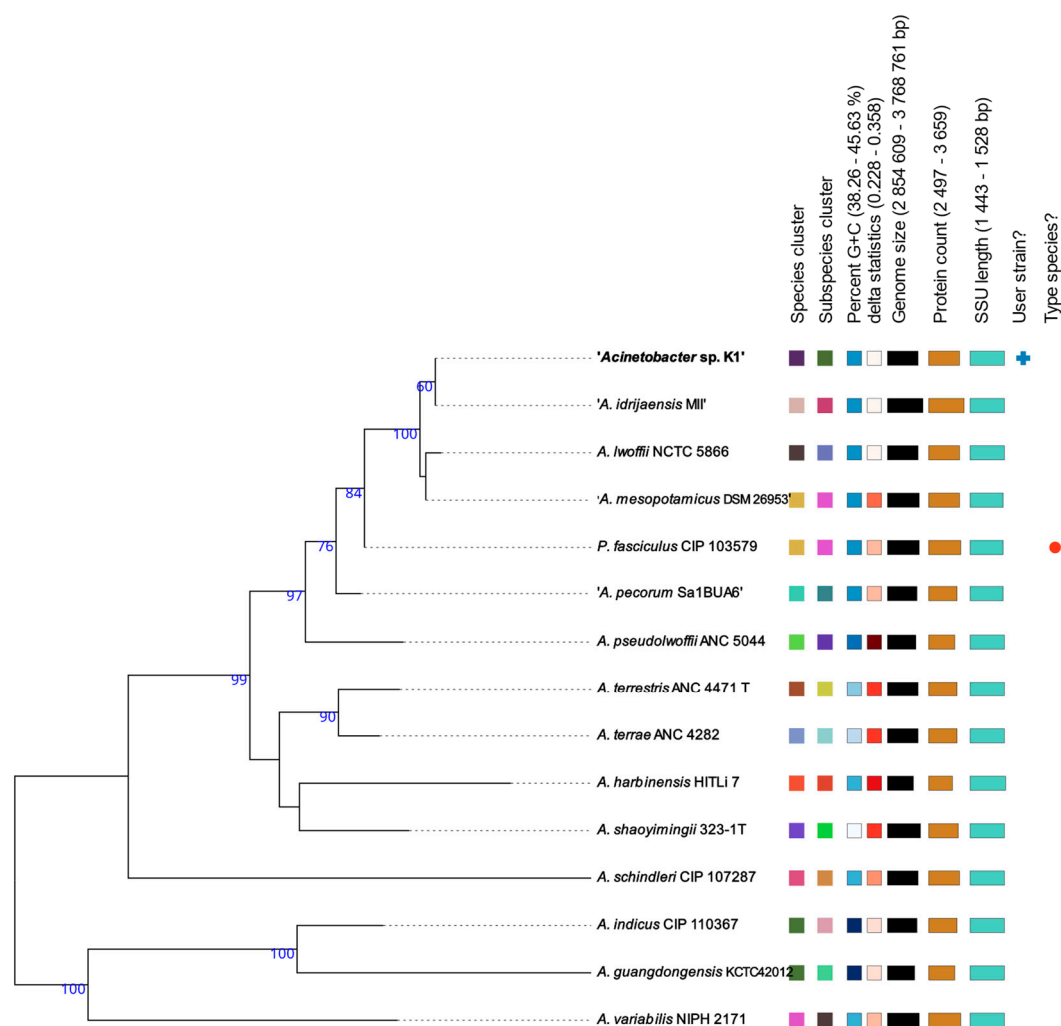

**Figure S1.** Phylogenetic analysis based on the 16S rDNA gene sequences of *Acinetobacter* spp. using the TYGS server [4]. Tree inferred with FastME 2.1.6.1 [5] from GBDP distances calculated from 16S rDNA gene sequences. The branch lengths are scaled in terms of GBDP distance formula d5. The numbers above branches are GBDP pseudo-bootstrap support values > 60 % from 100 replications, with an average branch support of 78.8 %. The tree was rooted at the midpoint [6]. Leaf labels are annotated by affiliation to species and subspecies clusters, genomic G+C content, delta values, overall genome sequence length, number of proteins and SSU length. Delta statistics permit assessment of accuracy in terms of tree-likeness; the lower the delta value, the greater the accuracy [7].

**Table S2.** The list of bacterial strains used to create the ANI similarity matrix and phylogenetic analysis.

| <b>Bacterial strain</b>                                       | <b>GenBank<br/>accession No.</b> | <b>Genome size (bp)</b> | <b>G+C content<br/>(%)</b> |
|---------------------------------------------------------------|----------------------------------|-------------------------|----------------------------|
| <i>Acinetobacter</i> sp. K1                                   | NZ_JALGQY000000000.1             | 3 357 632               | 42.76                      |
| <i>A. lwoffii</i> NIPH478                                     | NZ_APQU000000000.1               | 3 301 256               | 42.88                      |
| <i>A. lwoffii</i> UBA2051                                     | DDAT000000000.1                  | 2 885 052               | 43.35                      |
| <i>A. lwoffii</i> SH145                                       | NZ_ACPN000000000.1               | 3 481 004               | 42.58                      |
| <i>A. lwoffii</i> NIPH715                                     | NZ_APOT000000000.1               | 3 454 560               | 42.85                      |
| <i>A. lwoffii</i> NBRC109760                                  | NZ_BBSQ000000000.1               | 3 298 884               | 43.11                      |
| <i>A. lwoffii</i> NIPH512                                     | NZ_AYHO000000000.1               | 3 384 618               | 43.09                      |
| <i>A. lwoffii</i> NCTC5866**                                  | NZ_AIEL000000000.1               | 3 353 128               | 43.04                      |
| <i>A. lwoffii</i> CIP7031                                     | NZ_KB849830.1                    | 3 677 680               | 42.77                      |
| <i>A. lwoffii</i> ZS207                                       | NZ_CP019143.1                    | 3 259 224               | 43.18                      |
| <i>A. lwoffii</i> TG19636                                     | NZ_AMJG000000000.1               | 3 497 784               | 42.83                      |
| <i>A. lwoffii</i> UBA1649                                     | DCLL000000000.1                  | 3 033 116               | 43.31                      |
| <i>A. lwoffii</i> CIP64.10                                    | NZ_APQS000000000.1               | 3 218 415               | 43.04                      |
| <i>A. lwoffii</i> F78                                         | NZ_FLLN000000000.1               | 3 031 971               | 43.32                      |
| <i>A. lwoffii</i> WJ10621                                     | NZ_CM001194.1                    | 3 184 320               | 41.57                      |
| <i>A. idrijaensis</i> MII**                                   | GCA_000761495.1                  | 3 846 869               | 42.90                      |
| <i>A. mesopotamicus</i><br>DSM 26953/ <i>A. lwoffii</i> GC2** | NZ_JAALFF000000000.1             | 3 449 117               | 42.89                      |
| <i>Prolinoborus</i><br><i>fasciculus</i> CIP<br>103579**      | GCA_900322255.1                  | 3 450 331               | 42.99                      |
| <i>A. pecorum</i> Sa1BUA6**                                   | NZ_JACSPT010000000               | 3 220 949               | 42.85                      |

\*The type strain of *A. lwoffii*; \*\*bacterial strains that were part of the GBDP phylogenetic analysis performed using the TYGS server

Table S3. The ANI similarity matrix of the analyzed strains [8, 9].

|                                                     | ANI index (%)*           |         |             |       |             |                |                      |             |       |             |             |              |       |         |       | Acinetobacter spp. species             |                                                |                                                     |                                        |
|-----------------------------------------------------|--------------------------|---------|-------------|-------|-------------|----------------|----------------------|-------------|-------|-------------|-------------|--------------|-------|---------|-------|----------------------------------------|------------------------------------------------|-----------------------------------------------------|----------------------------------------|
|                                                     | <i>A. lwoffii</i> strain |         |             |       |             |                |                      |             |       |             |             |              |       |         |       | <i>A. idrijaensis</i><br><i>MII</i> ** | <i>A. mesopotamicus</i><br><i>DSM 26953</i> ** | <i>P. fasciculus</i> <i>CIP</i><br><i>103579</i> ** | <i>A. pecorum</i><br><i>Sa1BUA6</i> ** |
|                                                     | K1                       | NIPH478 | UBA205<br>1 | SH145 | NIPH71<br>5 | NBRC10<br>9760 | NIPH5NCTC58<br>12 66 | CIP70<br>31 | ZS207 | TG196<br>36 | UBA164<br>9 | CIP64.<br>10 | F78   | WJ10621 |       |                                        |                                                |                                                     |                                        |
| K1                                                  | -                        | 96.26   | 96.06       | 96.00 | 95.93       | 95.85          | 95.85                | 95.84       | 95.81 | 95.76       | 95.71       | 95.63        | 88.64 | 87.77   | 76.67 | 95.94                                  | 95.70                                          | 95.73                                               | 89.82                                  |
| NIPH478                                             | 96.26                    | -       | 95.94       | 96.04 | 96.04       | 95.82          | 95.89                | 95.93       | 96.08 | 95.99       | 95.83       | 95.78        | 88.54 | 87.57   | 76.87 | 96.04                                  | 95.77                                          | 95.91                                               | 89.75                                  |
| UBA2051                                             | 96.06                    | 95.94   | -           | 95.78 | 95.84       | 95.64          | 95.63                | 95.63       | 95.86 | 95.72       | 95.64       | 95.50        | 88.40 | 87.17   | 76.72 | 95.81                                  | 95.58                                          | 95.56                                               | 89.62                                  |
| SH145                                               | 96.00                    | 96.04   | 95.78       | -     | 96.64       | 96.15          | 96.25                | 96.12       | 96.92 | 96.40       | 96.74       | 95.91        | 88.91 | 88.09   | 88.09 | 96.09                                  | 96.61                                          | 96.55                                               | 89.67                                  |
| NIPH715                                             | 95.93                    | 96.04   | 95.84       | 96.64 | -           | 96.10          | 96.20                | 96.22       | 96.65 | 96.36       | 96.74       | 95.80        | 89.07 | 87.92   | 77.32 | 95.91                                  | 96.56                                          | 96.50                                               | 89.80                                  |
| NBRC109760                                          | 95.85                    | 95.82   | 95.64       | 96.15 | 96.10       | -              | 99.98                | 99.96       | 95.95 | 96.09       | 96.01       | 95.55        | 88.59 | 87.79   | 76.79 | 95.87                                  | 95.95                                          | 95.93                                               | 89.62                                  |
| NIPH512                                             | 95.85                    | 95.89   | 95.63       | 96.25 | 96.20       | 99.98          | -                    | 99.95       | 95.88 | 96.21       | 96.14       | 95.44        | 88.67 | 87.83   | 77.38 | 95.75                                  | 95.89                                          | 96.03                                               | 89.63                                  |
| NCTC5866**                                          | 95.84                    | 95.93   | 95.63       | 96.12 | 96.22       | 99.96          | 99.95                | -           | 95.90 | 96.24       | 96.09       | 95.57        | 88.65 | 87.82   | 76.95 | 95.73                                  | 95.86                                          | 95.96                                               | 89.81                                  |
| CIP7031                                             | 95.81                    | 96.08   | 95.86       | 96.92 | 96.65       | 95.95          | 95.88                | 95.90       | -     | 96.60       | 97.07       | 95.61        | 89.02 | 87.96   | 77.00 | 95.83                                  | 96.96                                          | 97.00                                               | 89.87                                  |
| ZS207                                               | 95.76                    | 95.99   | 95.72       | 96.40 | 96.36       | 96.09          | 96.21                | 96.24       | 96.60 | -           | 96.09       | 95.53        | 88.58 | 87.57   | 76.86 | 96.22                                  | 96.73                                          | 96.70                                               | 89.77                                  |
| TG19636                                             | 95.71                    | 95.83   | 95.64       | 96.74 | 96.74       | 96.01          | 96.14                | 96.09       | 97.07 | 96.09       | -           | 95.80        | 88.88 | 87.96   | 76.62 | 95.78                                  | 97.03                                          | 97.14                                               | 89.70                                  |
| UBA1649                                             | 95.63                    | 95.78   | 95.50       | 95.91 | 95.80       | 95.55          | 95.44                | 95.57       | 95.61 | 95.53       | 95.80       | -            | 88.71 | 87.63   | 76.38 | 95.83                                  | 95.75                                          | 95.56                                               | 89.45                                  |
| CIP64.10                                            | 88.64                    | 88.54   | 88.40       | 88.91 | 89.07       | 88.59          | 88.67                | 88.65       | 89.02 | 88.58       | 88.88       | 88.71        | -     | 96.60   | 77.18 | 88.78                                  | 88.87                                          | 88.92                                               | 86.11                                  |
| F78                                                 | 87.77                    | 87.57   | 87.17       | 88.09 | 87.92       | 87.79          | 87.83                | 87.82       | 87.96 | 87.57       | 87.96       | 87.63        | 96.60 | -       | 76.90 | 87.79                                  | 87.77                                          | 87.95                                               | 86.08                                  |
| WJ10621                                             | 76.67                    | 76.87   | 76.72       | 88.09 | 77.32       | 76.79          | 77.38                | 76.95       | 77.00 | 76.86       | 76.62       | 76.38        | 77.18 | 76.90   | -     | 76.94                                  | 77.20                                          | 77.29                                               | 76.17                                  |
| <i>A. idrijaensis</i><br><i>MII</i> **              | 95.94                    | 96.04   | 95.81       | 96.09 | 95.91       | 95.87          | 95.75                | 95.73       | 95.83 | 96.22       | 95.78       | 95.83        | 88.78 | 87.79   | 76.94 | -                                      | 95.76                                          | 95.83                                               | 89.56                                  |
| <i>A. mesopotamicus</i><br><i>DSM 26953</i> **      | 95.70                    | 95.77   | 95.58       | 96.61 | 96.56       | 95.95          | 95.89                | 95.86       | 96.96 | 96.73       | 97.03       | 95.75        | 88.87 | 87.77   | 77.20 | 95.76                                  | -                                              | 97.62                                               | 89.72                                  |
| <i>P. fasciculus</i> <i>CIP</i><br><i>103579</i> ** | 95.73                    | 95.91   | 95.56       | 96.55 | 96.50       | 95.93          | 96.03                | 95.96       | 97.00 | 96.70       | 97.14       | 95.56        | 88.92 | 87.95   | 77.29 | 95.83                                  | 97.62                                          | -                                                   | 89.75                                  |
| <i>A. pecorum</i><br><i>Sa1BUA6</i> **              | 89.82                    | 89.75   | 89.62       | 89.67 | 89.80       | 89.62          | 89.63                | 89.81       | 89.87 | 89.77       | 89.70       | 89.45        | 86.11 | 86.08   | 76.17 | 89.56                                  | 89.72                                          | 89.75                                               | -                                      |

\*The type strain of *A. lwoffii*; \*\*bacterial strains that were part of the GBDP phylogenetic analysis performed using the TYGS server; \*\*\* grey highlighting represents ANI values that are below cut-off level

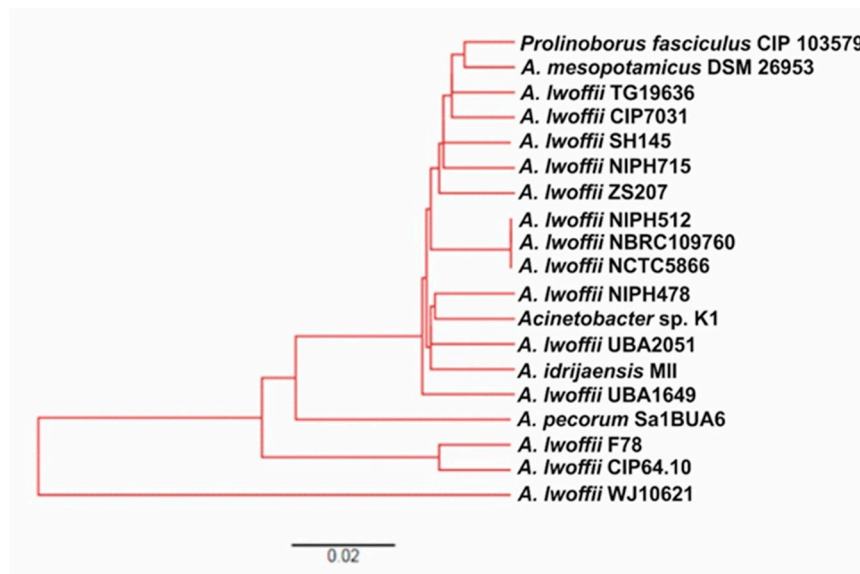

**Figure S2.** UPGMA phylogenetic tree of different strains of *Acinetobacter* species constructed based on the ANI similarity matrix between the analyzed strains [8-10].

**Table S3.** Prediction of plasmid and chromosomal DNA in the *Acinetobacter* sp. K1 genome using the server mlplasmids v2.1.0 [11] in correlation with the average GC content of contigs.

| Contig    | Size (bp) | Probability – chromosome* | Probability - plasmid * | Prediction* | G+C content (%) |
|-----------|-----------|---------------------------|-------------------------|-------------|-----------------|
| NODE 72   | 5918      | 0,018                     | 0,982                   | plasmid     | 34.6            |
| NODE 55   | 8994      | 0,043                     | 0,957                   | plasmid     | 34.6            |
| NODE 223  | 3148      | 0,043                     | 0,957                   | plasmid     | 37.2            |
| NODE 417  | 2522      | 0,057                     | 0,943                   | plasmid     | 34.8            |
| NODE 228  | 3051      | 0,064                     | 0,936                   | plasmid     | 37              |
| NODE 68   | 6259      | 0,07                      | 0,93                    | plasmid     | 32              |
| NODE 130  | 3934      | 0,074                     | 0,926                   | plasmid     | 38.1            |
| NODE 211  | 3202      | 0,114                     | 0,886                   | plasmid     | 37.8            |
| NODE 66   | 6322      | 0,129                     | 0,871                   | plasmid     | 33              |
| NODE 375  | 2618      | 0,129                     | 0,871                   | plasmid     | 33.3            |
| NODE 2568 | 1144      | 0,131                     | 0,869                   | plasmid     | 46.8            |
| NODE 1680 | 1426      | 0,148                     | 0,852                   | plasmid     | 35.4            |
| NODE 2039 | 1299      | 0,153                     | 0,847                   | plasmid     | 39.8            |
| NODE 110  | 4254      | 0,157                     | 0,843                   | plasmid     | 33.9            |
| NODE 580  | 2252      | 0,159                     | 0,841                   | plasmid     | 37.7            |
| NODE 48   | 14852     | 0,161                     | 0,839                   | plasmid     | 39.5            |
| NODE 97   | 4628      | 0,161                     | 0,839                   | plasmid     | 34.3            |
| NODE 57   | 8544      | 0,176                     | 0,824                   | plasmid     | 44.5            |
| NODE 3060 | 1034      | 0,176                     | 0,824                   | plasmid     | 34.5            |
| NODE 485  | 2390      | 0,189                     | 0,811                   | plasmid     | 33.6            |
| NODE 42   | 21048     | 0,213                     | 0,787                   | plasmid     | 35.2            |
| NODE 43   | 18602     | 0,237                     | 0,763                   | plasmid     | 37.8            |
| NODE 47   | 15243     | 0,283                     | 0,717                   | plasmid     | 33.6            |
| NODE 1101 | 1715      | 0,311                     | 0,689                   | plasmid     | 27.9            |
| NODE 161  | 3534      | 0,345                     | 0,655                   | plasmid     | 42.6            |
| NODE 2715 | 1110      | 0,368                     | 0,632                   | plasmid     | 39.5            |
| NODE 49   | 12221     | 0,375                     | 0,625                   | plasmid     | 30.5            |
| NODE 878  | 1905      | 0,386                     | 0,614                   | plasmid     | 38.3            |
| NODE 29   | 44217     | 0,394                     | 0,606                   | plasmid     | 43              |
| NODE 13   | 78976     | 0,41                      | 0,59                    | plasmid     | 43.4            |
| NODE 4-2  | 34994     | 0,433                     | 0,567                   | plasmid     | 42.8            |
| NODE 31   | 35965     | 0,434                     | 0,566                   | plasmid     | 44.6            |
| NODE 1947 | 1329      | 0,457                     | 0,543                   | plasmid     | 37.6            |
| NODE 2408 | 1188      | 0,458                     | 0,542                   | plasmid     | 42.7            |
| NODE 17   | 62178     | 0,465                     | 0,535                   | plasmid     | 39.2            |
| NODE 38   | 27781     | 0,471                     | 0,529                   | plasmid     | 38.6            |
| NODE 39   | 26463     | 0,476                     | 0,524                   | plasmid     | 42.2            |
| NODE 2098 | 1282      | 0,501                     | 0,499                   | chromosome  | 37.8            |
| NODE 33   | 32163     | 0,519                     | 0,481                   | chromosome  | 42.9            |
| NODE 127  | 3941      | 0,536                     | 0,464                   | chromosome  | 44.2            |
| NODE 100  | 4556      | 0,537                     | 0,463                   | chromosome  | 43.4            |

|           |        |       |       |            |      |
|-----------|--------|-------|-------|------------|------|
| NODE 45   | 18048  | 0,547 | 0,453 | chromosome | 38.8 |
| NODE 565  | 2270   | 0,567 | 0,433 | chromosome | 34.5 |
| NODE 6    | 141043 | 0,575 | 0,425 | chromosome | 43.1 |
| NODE 20   | 55230  | 0,58  | 0,42  | chromosome | 45.1 |
| NODE 44   | 18520  | 0,629 | 0,371 | chromosome | 41.7 |
| NODE 2    | 272913 | 0,636 | 0,364 | chromosome | 43.8 |
| NODE 2641 | 1126   | 0,652 | 0,348 | chromosome | 48.1 |
| NODE 51   | 10566  | 0,656 | 0,344 | chromosome | 45.1 |
| NODE 4-1  | 115960 | 0,665 | 0,335 | chromosome | 43.8 |
| NODE 23   | 51990  | 0,673 | 0,327 | chromosome | 43.4 |
| NODE 15   | 68811  | 0,676 | 0,324 | chromosome | 42.6 |
| NODE 8    | 107513 | 0,68  | 0,32  | chromosome | 42.9 |
| NODE 35   | 29453  | 0,719 | 0,281 | chromosome | 43.9 |
| NODE 14   | 73337  | 0,725 | 0,275 | chromosome | 43.9 |
| NODE 5    | 147787 | 0,731 | 0,269 | chromosome | 45.2 |
| NODE 32   | 34241  | 0,746 | 0,254 | chromosome | 42.3 |
| NODE 34   | 31431  | 0,756 | 0,244 | chromosome | 38.7 |
| NODE 27   | 45448  | 0,767 | 0,233 | chromosome | 42.9 |
| NODE 40   | 24304  | 0,77  | 0,23  | chromosome | 42.3 |
| NODE 9    | 102282 | 0,777 | 0,223 | chromosome | 41.3 |
| NODE 16   | 65633  | 0,781 | 0,219 | chromosome | 42.3 |
| NODE 50   | 12045  | 0,794 | 0,206 | chromosome | 38.8 |
| NODE 2099 | 1282   | 0,794 | 0,206 | chromosome | 40   |
| NODE 2138 | 1270   | 0,796 | 0,204 | chromosome | 48   |
| NODE 19   | 58134  | 0,803 | 0,197 | chromosome | 43.4 |
| NODE 12   | 80362  | 0,818 | 0,182 | chromosome | 44.6 |
| NODE 37   | 27851  | 0,819 | 0,181 | chromosome | 42.6 |
| NODE 10   | 100485 | 0,823 | 0,177 | chromosome | 43.7 |
| NODE 261  | 3010   | 0,831 | 0,169 | chromosome | 38.3 |
| NODE 1    | 316667 | 0,832 | 0,168 | chromosome | 43.7 |
| NODE 21   | 55014  | 0,834 | 0,166 | chromosome | 42   |
| NODE 22   | 54990  | 0,834 | 0,166 | chromosome | 41.4 |
| NODE 36   | 29291  | 0,835 | 0,165 | chromosome | 43.2 |
| NODE 18   | 61241  | 0,839 | 0,161 | chromosome | 42.9 |
| NODE 3    | 165452 | 0,846 | 0,154 | chromosome | 43.7 |
| NODE 7    | 122405 | 0,856 | 0,144 | chromosome | 42.3 |
| NODE 30   | 43735  | 0,857 | 0,143 | chromosome | 42.6 |
| NODE 67   | 6294   | 0,873 | 0,127 | chromosome | 43.7 |
| NODE 56   | 8733   | 0,889 | 0,111 | chromosome | 39.7 |
| NODE 11   | 93093  | 0,894 | 0,106 | chromosome | 44.6 |
| NODE 46   | 17232  | 0,897 | 0,103 | chromosome | 41.5 |
| NODE 25   | 50082  | 0,922 | 0,078 | chromosome | 43.7 |
| NODE 24   | 50807  | 0,928 | 0,072 | chromosome | 43.3 |
| NODE 28   | 44964  | 0,961 | 0,039 | chromosome | 41.8 |
| NODE 52   | 10319  | 0,97  | 0,03  | chromosome | 40.1 |

---



**Table S4.** Genetic analysis of contig sequences of the *Acinetobacter* sp. K1 genome, based on the results of various bioinformatic tools and databases: blastn, blastx [12], RAST [1-3], CD-Search (Conserved Domain Database) [13], ORF finder (<https://www.ncbi.nlm.nih.gov/orffinder/>), mlplasmids v2.1.0 [11], Genomics %G-C Content Calculator (<https://www.sciencebuddies.org/science-fair-projects/references/genomics-g-c-content-calculator>).

| Plasmid/<br>NODE | Size<br>(bp) | GenBank<br>accession No. | Replication                      | HGT                              | Resistance                         | Blastn<br>best hit                                                                                             | GenBank<br>accession<br>No. | Coverage<br>Identity<br>(%) | G+C content<br>(%) |
|------------------|--------------|--------------------------|----------------------------------|----------------------------------|------------------------------------|----------------------------------------------------------------------------------------------------------------|-----------------------------|-----------------------------|--------------------|
| pALK1            | 3 051        | ON109139.1               | Rep_3;<br>RepM                   | MobM                             | -                                  | <i>A. defluvii</i><br>WCHA30;<br><b>p6_010030</b>                                                              | CP029394.2                  | 99<br>91.44                 | 36.97              |
| unnamed1         | 6 259        | NZ_JALGQY010000057.1     | rep_pAB02_O<br>RF2;<br>Replikase | Serine recombinase<br>family     | -                                  | <i>A. lwoffii</i> ED9-5a<br><b>chromosome/</b><br><i>A. pittii</i> 2012N21-<br>164; <b>p2012N21-<br/>164-4</b> | CP083571.1/<br>CP033539.1   | 4<br>87.44/<br>5<br>78.31   | 32.03              |
| unnamed2         | 5 918        | NZ_JALGQY010000058.1     | Rep_3; RepM                      | MobA_MobL;<br>TraA_Ti            | -                                  | <i>A. schindleri</i><br>HZE23-1,<br><b>pHZE23-1-6</b>                                                          | CP044469.1                  | 7<br>98.07                  | 34.62              |
| NODE 4-2         | 34 994       | NZ_JALGQY010000005       | -                                | IS5_3 transposase<br>superfamily | AcrA, AcrB;<br>RND_mfp superfamily | <i>Acinetobacter</i> sp.<br>WY4;<br><b>chromosome</b>                                                          | CP053947.1                  | 98<br>96.96                 | 42.8               |
| NODE 13          | 78 976       | NZ_JALGQY010000014       | -                                | -                                | CzcD                               | <i>A. lwoffii</i> DSM<br>2403;<br><b>chromosome</b>                                                            | CP118963.1                  | 99<br>96.56                 | 43.4               |
| NODE 15          | 68 811       | NZ_JALGQY010000016       | -                                | -                                | CueR; CopA, CopZ;                  | <i>A. lwoffii</i> ED23-35;                                                                                     | CP082143.1                  | 98                          | 42.6               |

|         |        |                    |   |                                                                                                                                                                                                |                                                                          |                                                                     |                           |                  |      |
|---------|--------|--------------------|---|------------------------------------------------------------------------------------------------------------------------------------------------------------------------------------------------|--------------------------------------------------------------------------|---------------------------------------------------------------------|---------------------------|------------------|------|
|         |        |                    |   |                                                                                                                                                                                                | MerR_1<br>ZntA; MdlB; SUL1<br>ArsR/SmtB family;<br>MFS_YfcJ_like family; | <b>chromosome</b>                                                   |                           | 97.38            |      |
| NODE 17 | 62 178 | NZ_JALGQY010000018 | - | IS3, IS5, IS21, IS481,<br>ISNCY transposase<br>family;<br>XerC integrase                                                                                                                       | TauE                                                                     | <i>A. haemolyticus</i><br>w12; <b>plasmid p4</b>                    | CP085288.1                | 63<br>97.42      | 39.2 |
| NODE 29 | 44 217 | NZ_JALGQY010000029 | - | LGT_TIGR03299<br>phage/plasmid-like<br>protein;<br>COG5377 phage<br>protein superfamily;<br>AlpA superfamily;<br>Inovirus_Gp2<br>superfamily;<br>IS66 transposase<br>family;<br>XerC integrase | Fur; SmtA                                                                | <i>Acinetobacter</i> sp.<br>WY4;<br><b>chromosome</b>               | CP053947.1                | 82<br>96.87      | 43   |
| NODE 31 | 35 965 | NZ_JALGQY010000031 | - | -                                                                                                                                                                                              | -                                                                        | <i>A. lwoffii</i><br>FDAARGOS 1394;<br><b>chromosome</b>            | CP077369.1                | 100<br>96.46     | 44.6 |
| NODE 34 | 31 431 | NZ_JALGQY010000034 | - | IS6 transposase<br>family;<br>Serine recombinase                                                                                                                                               | CopA, CopB, CopC,<br>CopD, CopZ;<br>CusS, CusR; PcoB;                    | <i>A. seifertii</i> AS40,<br><b>pAS40-2/</b><br><i>A. johnsonii</i> | CP061642.1/<br>CP090416.1 | 63<br>99.56<br>/ | 38.7 |

|         |        |                      |                                                                 |                                                                                                                                |                                                                                                 |                                                                         |            |             |       |
|---------|--------|----------------------|-----------------------------------------------------------------|--------------------------------------------------------------------------------------------------------------------------------|-------------------------------------------------------------------------------------------------|-------------------------------------------------------------------------|------------|-------------|-------|
|         |        |                      |                                                                 |                                                                                                                                | ChrA, ChrB;<br>CzcD; ZntA; DmeF                                                                 | ICE_NC<br><b>chromosome</b>                                             |            | 88<br>95.85 |       |
| NODE 38 | 27 781 | NZ_JALGQY010000038.1 | rep_pAB02_O<br>RF2                                              | IS3, IS481, IS6<br>transposase family;<br>XerC integrase                                                                       | RcnR-FrmR-<br>like_DUF156;<br>MefA protein family;<br>AcrR;<br>GST_N_GTT1/ GST_C<br>superfamily | <i>A. lwoffii</i> AL_065,<br><b>pAL_065-3</b>                           | CP078047.1 | 94<br>96.64 | 38.6  |
| NODE 39 | 26 463 | NZ_JALGQY010000039   | -                                                               | IS5_2 transposase<br>family                                                                                                    | RND_mfp superfamily<br>OtsA, OtsB                                                               | <i>A. lwoffii</i> VS15;<br><b>chromosome</b>                            | CP080576.1 | 98<br>96.50 | 42.2  |
| NODE 42 | 21 048 | NZ_JALGQY010000041   | -                                                               | IS5_3, IS630<br>superfamily                                                                                                    | -                                                                                               | <i>A. lwoffii</i> VS15;<br><b>chromosome</b>                            | CP080576.1 | 45<br>97.50 | 35.2  |
| NODE 43 | 18 602 | NZ_JALGQY010000042.1 | RepM                                                            | IS481 a IS3<br>transposase family<br>Relaxase; MobC                                                                            | CopA, CopB                                                                                      | <i>A. pseudolwoffii</i><br>XMC5X702;<br><b>pXMC5X702-<br/>tetX-145k</b> | CP084302.1 | 68<br>98.89 | 37.83 |
| NODE 47 | 15 243 | NZ_JALGQY010000046   | repM_Acin;<br>rep_pAB02_O<br>RF2;<br>DNA_BRE_C<br>super family; | Serine recombinase<br>family;<br>VirD4 superfamily;<br>ComFC superfamily;<br>Phage_int_SAM_2<br>phage integrase<br>superfamily | -                                                                                               | <i>A. johnsonii</i><br>FDAARGOS_1094<br>; <b>unnamed6</b>               | CP068191.1 | 30<br>93.78 | 33.64 |
| NODE 48 | 14 852 | NZ_JALGQY010000047   | -                                                               | IS3 transposase                                                                                                                | ArsR/SmtB family;                                                                               | <i>A. indicus</i>                                                       | CP024620.2 | 60          | 39.5  |

|         |        |                      |                                     |                                       |                                                                 |                                                       |            |              |       |
|---------|--------|----------------------|-------------------------------------|---------------------------------------|-----------------------------------------------------------------|-------------------------------------------------------|------------|--------------|-------|
|         |        |                      |                                     | family                                | TauE                                                            | SGAir0564;<br><b>chromosome</b>                       |            | 100          |       |
| NODE 49 | 12 221 | NZ_JALGQY010000048   | -                                   | -                                     | -                                                               | <i>A. johnsonii</i> AJ312;<br><b>chromosome</b>       | CP045051.1 | 45<br>88.99  | 30.5  |
| NODE 50 | 12 045 | NZ_JALGQY010000049   | -                                   | IS3, IS5_3<br>transposase family      | ArsC, ArsO, Acr3;<br>SUL1 superfamily                           | <i>A. lwoffii</i> ED9-5a;<br><b>pALWED3.1</b>         | CP083572.1 | 74<br>99.49  | 38.8  |
| NODE 55 | 8 994  | NZ_JALGQY010000052.1 | Rep_3; RepM;<br>rep_pAB02_O<br>RF2; | MobA_MobL;<br>TraA_Ti                 | TerC superfamily;<br>SUL1 superfamily                           | <i>A. lwoffii</i> EK30A;<br><b>pALWEK1.1</b>          | CP032102.1 | 79<br>95.17  | 36.21 |
| NODE 56 | 8 733  | NZ_JALGQY010000053   | -                                   | -                                     | CzcA, CzcD;<br>TolC; CadR-PbrR<br>CusB/AcrA                     | <i>A. lwoffii</i><br>FDAARGOS_552;<br><b>unnamed1</b> | CP046295.1 | 100<br>99.26 | 39.7  |
| NODE 57 | 8 544  | NZ_JALGQY010000054   | -                                   | IS5_3 transposase<br>family           | ArsH, ArsC, ArsO,<br>ArsR, Acr3;<br>cztS_silS_copS<br>Pfam00520 | <i>A. lwoffii</i> DSM<br>2403;<br><b>chromosome</b>   | CP118963.1 | 99<br>99.06  | 44.5  |
| NODE 66 | 6 322  | NZ_JALGQY010000055.1 | Rep_3; RepM;<br>rep_pAB02_O<br>RF2; | -                                     | RamA                                                            | <i>A. baumannii</i> SDF;<br><b>p3ABSDF</b>            | CU468233.1 | 52<br>99.08  | 32.96 |
| NODE 97 | 4 628  | NZ_JALGQY010000059   | -                                   | IS5_2 transposase<br>family;<br>ComEC | -                                                               | <i>A. indicus</i> C15_T;<br><b>pC15-2</b>             | CP048656.1 | 64<br>99.79  | 34.3  |

|          |       |                      |                               |                                     |                                 |                                                 |            |              |       |
|----------|-------|----------------------|-------------------------------|-------------------------------------|---------------------------------|-------------------------------------------------|------------|--------------|-------|
| NODE 110 | 4 254 | NZ_JALGQY010000061   | -                             | IS5_3 transposase family            | -                               | <i>Acinetobacter</i> sp. WY4; <b>chromosome</b> | CP053947.1 | 98<br>96.87  | 33.9  |
| NODE 130 | 3 934 | NZ_JALGQY010000063   | -                             | IS6, IS240 transposase family       | CadR-PbrR Kup                   | <i>A. schindleri</i> BDT2091; <b>pBDT2091-4</b> | CP094838.1 | 76<br>93.55  | 38.1  |
| NODE 161 | 3 534 | NZ_JALGQY010000064   | -                             | -                                   | -                               | <i>A. lwoffii</i> H7; <b>chromosome</b>         | CP072549.1 | 97<br>98.79  | 42.6  |
| NODE 211 | 3 202 | NZ_JALGQY010000065   | -                             | Phage_antiter_Q                     | Beta-lactamase; Phenol_MetA_deg | <i>A. lwoffii</i> ED45-23; <b>pALWED2.8</b>     | CP032123.1 | 70<br>99.65  | 37.8  |
| NODE 223 | 3 148 | NZ_JALGQY010000066.1 | Rep_3; RepM; rep_pAB02_O RF2; | -                                   | -                               | <i>A. lwoffii</i> AL_065; <b>pAL_065-5</b>      | CP078049.1 | 100<br>97.19 | 37.23 |
| NODE 261 | 3 010 | NZ_JALGQY010000068   | -                             | -                                   | CzcD                            | <i>A. lwoffii</i> FDAARGOS_557; <b>unnamed3</b> | CP054804.1 | 100<br>99.37 | 38.3  |
| NODE 375 | 2 618 | NZ_JALGQY010000069   | -                             | Serine recombinase PinE rekombinase | ABC_trans_N                     | <i>A. lwoffii</i> FDAARGOS_551; <b>unnamed1</b> | CP054821.1 | 53<br>97.32  | 33.3  |
| NODE 417 | 2 522 | NZ_JALGQY010000070   | -                             | IS3 transposase family              | -                               | <i>A. bereziniae</i> AB839; <b>pAB839-1</b>     | CP119243.1 | 56<br>98.41  | 34.8  |

|           |       |                    |   |                                                                 |                                       |                                                                                                     |                           |                               |      |
|-----------|-------|--------------------|---|-----------------------------------------------------------------|---------------------------------------|-----------------------------------------------------------------------------------------------------|---------------------------|-------------------------------|------|
| NODE 485  | 2 390 | NZ_JALGQY010000071 | - | PBECR3 superfamily                                              | -                                     | <i>A. lwoffii</i> AL_065;<br><b>pAL_065-5</b>                                                       | CP078049.1                | 37<br>98.99                   | 33.6 |
| NODE 580  | 2 252 | NZ_JALGQY010000073 | - | ISNCY_2 transposase<br>family;<br>mob_myst_B                    | -                                     | <i>A. lwoffii</i> ZS207;<br><b>pmZS</b>                                                             | CP019144.2                | 97<br>99.3                    | 37.7 |
| NODE 878  | 1 905 | NZ_JALGQY010000074 | - | IS5_3 transposase<br>family;<br>INT_Rci_Hp1_C<br>recombinase    | -                                     | <i>A. lwoffii</i> ZS207;<br><b>chromosome</b>                                                       | CP019143.2                | 87<br>95.01                   | 38.3 |
| NODE 1101 | 1 715 | NZ_JALGQY010000075 | - | -                                                               | -                                     | <i>A. indicus</i> TQ18;<br><b>chromosome</b>                                                        | CP045131.1                | 17<br>90.10                   | 27.9 |
| NODE 1680 | 1 426 | NZ_JALGQY010000076 | - | -                                                               | CrcB                                  | <i>A. lwoffii</i> DSM<br>2403;<br><b>unnamed3</b>                                                   | CP118966.1                | 100<br>100                    | 35.4 |
| NODE 1947 | 1 329 | NZ_JALGQY010000077 | - | -                                                               | CzcD; MerR; CadR-<br>PbrR; ZntA; ZitB | <i>A. lwoffii</i> DSM<br>2403; <b>unnamed1</b>                                                      | CP118964.1                | 100<br>99.62                  | 37.6 |
| NODE 2039 | 1 299 | NZ_JALGQY010000078 | - | Transposase_mut<br>superfamily;<br>IS1249 transposase<br>family | -                                     | <i>A. haemolyticus</i><br>AN3;<br><b>chromosome</b> /<br><i>A. towneri</i> AT235;<br><b>unnamed</b> | CP031984.1/<br>CP062186.1 | 100<br>99.77/<br>100<br>99.69 | 39.8 |
| NODE 2408 | 1 188 | NZ_JALGQY010000082 | - | IS3 transposase<br>family                                       | -                                     | <i>A. baumannii</i><br>VB35179;                                                                     | CP040054.1/<br>CP024418.1 | 99<br>99.92/                  | 42.7 |

|           |       |                    |   |                           |      |                                                                                                              |                           |                             |      |
|-----------|-------|--------------------|---|---------------------------|------|--------------------------------------------------------------------------------------------------------------|---------------------------|-----------------------------|------|
|           |       |                    |   |                           |      | <b>unnamed1/<br/>A. baumannii<br/>A388;<br/>chromosome</b>                                                   |                           | 100<br>99.92                |      |
| NODE 2568 | 1 144 | NZ_JALGQY010000083 | - | MobA_MobL;<br>TraA_Ti     | TelA | <i>Acinetobacter</i> sp.<br>10FS3-1;<br><b>p10FS3-1-9</b>                                                    | CP039152.1                | 100<br>98.51                | 46.8 |
| NODE 2715 | 1 110 | NZ_JALGQY010000085 | - | -                         | -    | <i>A. lwoffii</i> DSM<br>2403;<br><b>chromosome</b>                                                          | CP118963.1                | 93<br>98.94                 | 39.5 |
| NODE 3060 | 1 034 | NZ_JALGQY010000086 | - | IS3 transposase<br>family | -    | <i>A. wuhouensis</i><br>WCHA60;<br><b>chromosome/</b><br><i>A. wuhouensis</i><br>WCHA60;<br><b>p2_010060</b> | CP031716.1/<br>CP031710.1 | 57<br>98.99/<br>57<br>99.32 | 34.5 |

\*Contigs showing the discrepancy between different bioinformatic analyses used (orange), contigs having a higher average GC content than most plasmid-related contigs (grey), contigs with the lowest average GC content within the entire genome (blue).

## References

1. Aziz, R.K.; Bartels, D.; Best, A.A. et al. The RAST Server: Rapid annotations using subsystems technology. *BMC Genom.* 2008, 9, 75; <https://doi.org/10.1186/1471-2164-9-75>
2. Overbeek, R.; Olson, R.; Pusch, G.D. et al. The SEED and the Rapid Annotation of microbial genomes using Subsystems Technology (RAST). *Nucleic Acids Res.* 2014, 42, 206-214; <https://doi.org/10.1093/nar/gkt1226>
3. Brettin, T.; Davis, J.J.; Disz, T. et al. RASTtk: A modular and extensible implementation of the RAST algorithm for building custom annotation pipelines and annotating batches of genomes. *Sci. Rep.* 2015, 5, 8365; <https://doi.org/10.1038/srep08365>
4. Meier-Kolthoff, J.P.; Göker, M. TYGS is an automated high-throughput platform for state-of-the-art genome-based taxonomy. *Nat. Commun.* 2019, 10, 2182; <https://doi.org/10.1038/s41467-019-10210-3>
5. Lefort, V.; Desper, R.; Gascuel, O. FastME 2.0: A comprehensive, accurate, and fast distance-based phylogeny inference program. *Mol. Biol. Evol.* 2015, 32, 2798–2800; <https://doi.org/10.1093/molbev/msv150>
6. Farris, J.S. Estimating phylogenetic trees from distance matrices. *Am. Nat.* 1972, 106, 645–667; <https://www.jstor.org/stable/2459725>
7. Holland, B.R.; Huber, K.T.; Dress, A.; Moulton, V. Delta plots: a tool for analyzing phylogenetic distance data. *Mol. Biol. Evol.* 2002, 19, 2051–2059; <https://doi.org/10.1093/oxfordjournals.molbev.a004030>
8. Goris, J.; Konstantinidis, K.T.; Klappenbach, J.A. et al. DNA–DNA hybridization values and their relationship to whole-genome sequence similarities. *Int. J. Syst. Evol. Microbiol.* 2007, 57(1), 81-91; <https://doi.org/10.1099/ijs.0.64483-0>
9. Rodriguez-R, L.M.; Konstantinidis, K.T. Estimating coverage in metagenomic data sets and why it matters. *ISME J* 2014, 8(11), 2349-2351; <https://doi.org/10.1038/ismej.2014.76>
10. Moore, R.M.; Harrison, A.O.; Mcallister, S.M. et al. 2020. Iroki: automatic customization and visualization of phylogenetic trees. *PeerJ* 2020, 8, e8584; <https://doi.org/10.7717/peerj.8584>
11. Arredondo-Alonso, S.; Rogers, M.R.C.; Braat, J.C. et al. mlplasmids: a user-friendly tool to predict plasmid- and chromosome-derived sequences for single species. *Microb. Genom.* 2018, 4(1); <https://doi.org/10.1099/mgen.0.000224>
12. Altschul, S.F.; Gish, W.; Miller, W. et al. Basic local alignment search tool. *J. Mol. Biol.* 1990, 215, 403–10; [https://doi.org/10.1016/S0022-2836\(05\)80360-2](https://doi.org/10.1016/S0022-2836(05)80360-2)
13. Marchler-Bauer, A.; Lu, S.; Anderson, J.B. et al. CDD: a Conserved Domain Database for the functional annotation of proteins. *Nucleic Acids Res.* 2011, 39, 225-229; <https://doi.org/10.1093/nar/gkq1189>
